# Supplementary material for: Phage strategies facilitate bacterial coexistence under environmental variability
Source: PeerJ journal article supplement (doi:10.7717/peerj.12194), 2021-11-04
Supplement: Figure_S1.pdf [file Figure_S1.pdf]

Lysis rate  $\text{hr}^{-1}$

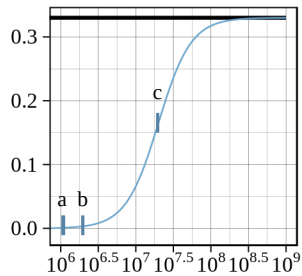

log<sub>10</sub> Abundance

Switch lytic/lysogenic infection

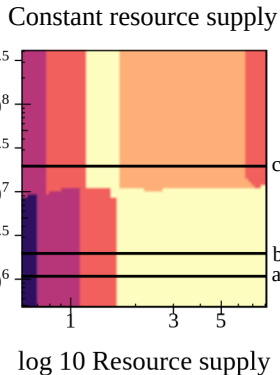

log 10 Resource supply

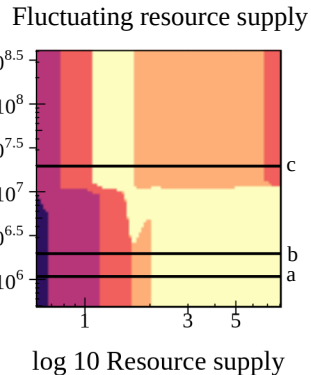

log 10 Resource supply

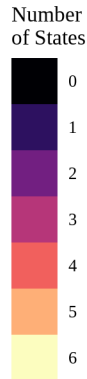

a)  $SW = 1.10 \cdot 10^6$

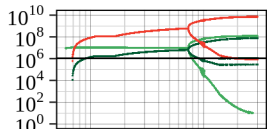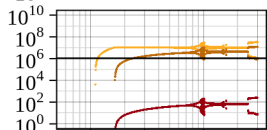

log 10 Resource supply

b)  $SW = 2.01 \cdot 10^6$

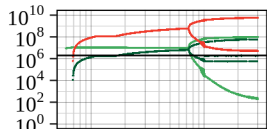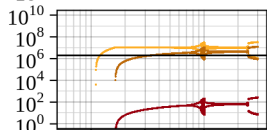

log 10 Resource supply

c)  $SW = 2.00 \cdot 10^7$

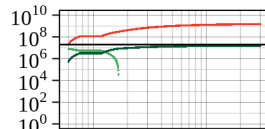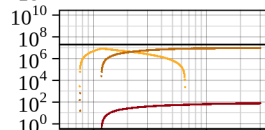

log 10 Resource supply

log<sub>10</sub> Abundance
