# Supplementary material for: Phage strategies facilitate bacterial coexistence under environmental variability
Source: PeerJ journal article supplement (doi:10.7717/peerj.12194), 2021-11-04
Supplement: Figure_S2.pdf [file Figure_S2.pdf]

Lysis rate  $\text{hr}^{-1}$

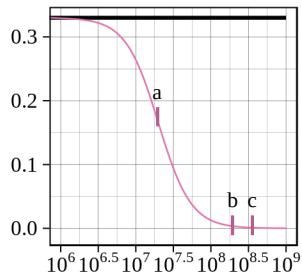

log<sub>10</sub> Abundance

Switch lytic/lysogenic infection

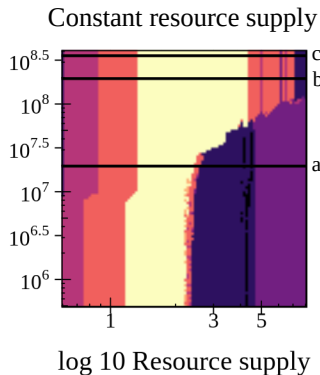

log<sub>10</sub> Resource supply

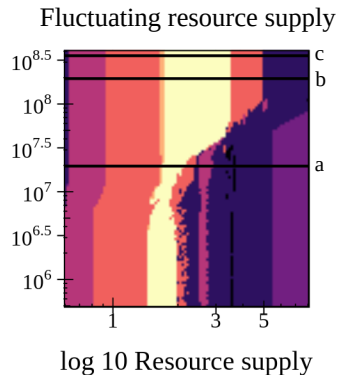

log<sub>10</sub> Resource supply

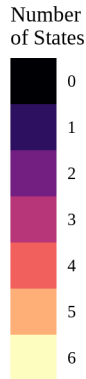

a)  $SW = 2.00 \cdot 10^7$

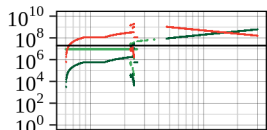

b)  $SW = 1.99 \cdot 10^8$

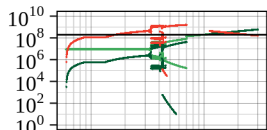

c)  $SW = 3.63 \cdot 10^8$

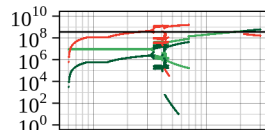

log<sub>10</sub> Abundance

log<sub>10</sub> Resource supply

log<sub>10</sub> Resource supply

log<sub>10</sub> Resource supply
