# Supplementary material for: Phage strategies facilitate bacterial coexistence under environmental variability
Source: PeerJ journal article supplement (doi:10.7717/peerj.12194), 2021-11-04
Supplement: Figure_S5.pdf [file Figure_S5.pdf]

### Lytic infection

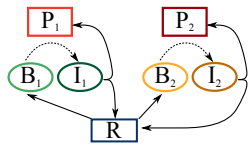

### Without the viral shunt

A

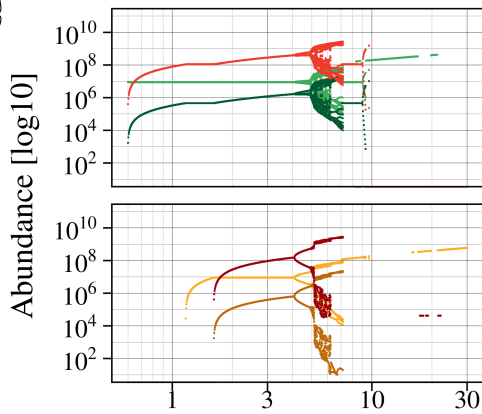

### With the viral shunt

B

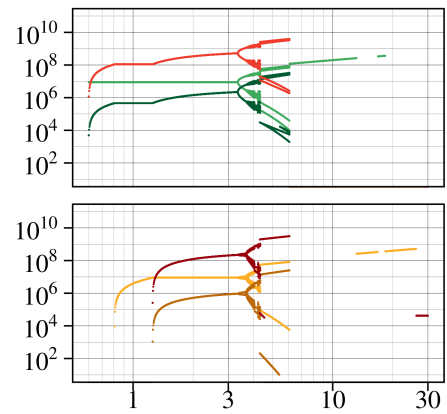

### PtW

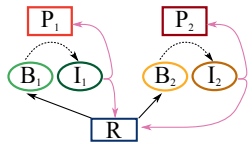

C

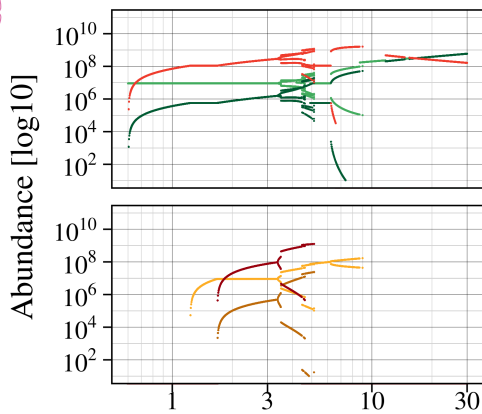

D

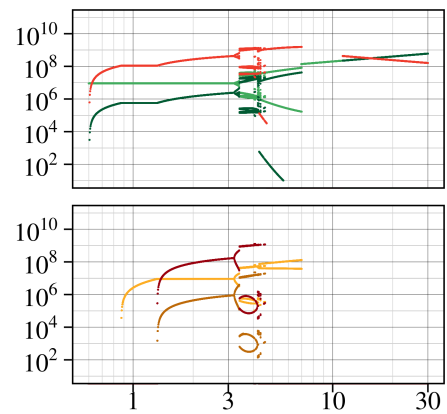

### PtL

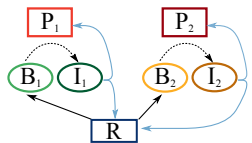

E

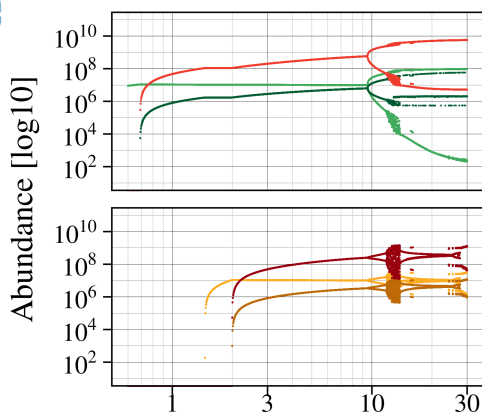

F

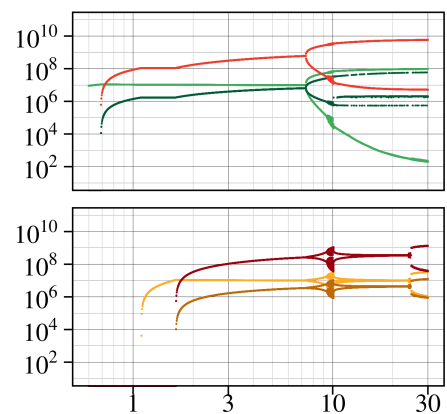

Resource supply

Resource supply
