# Supplementary material for: Phage strategies facilitate bacterial coexistence under environmental variability
Source: PeerJ journal article supplement (doi:10.7717/peerj.12194), 2021-11-04
Supplement: Figure_S7.pdf [file Figure_S7.pdf]

Bacteria (fast)

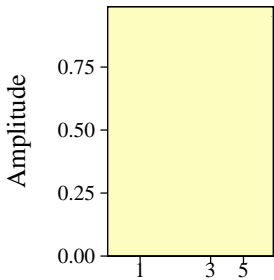

Infection (fast)

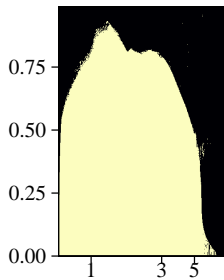

Bacteria (slow)

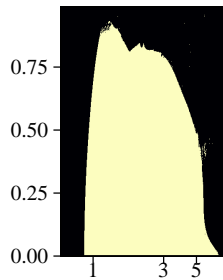

Infection (slow)

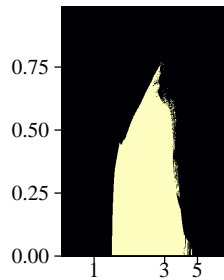

Turnover period [days]

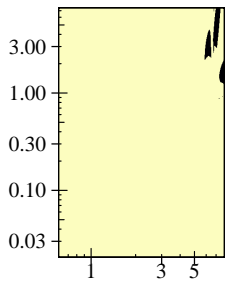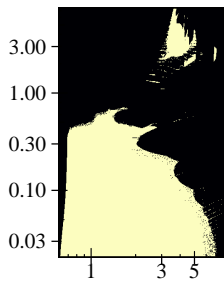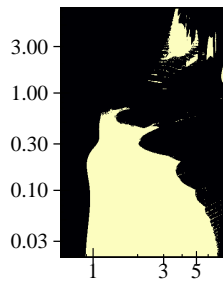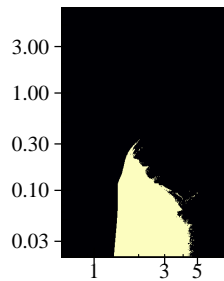

Presence

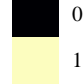

Resource supply

Resource supply

Resource supply

Resource supply
