# Supplementary material for: Phage strategies facilitate bacterial coexistence under environmental variability
Source: PeerJ journal article supplement (doi:10.7717/peerj.12194), 2021-11-04

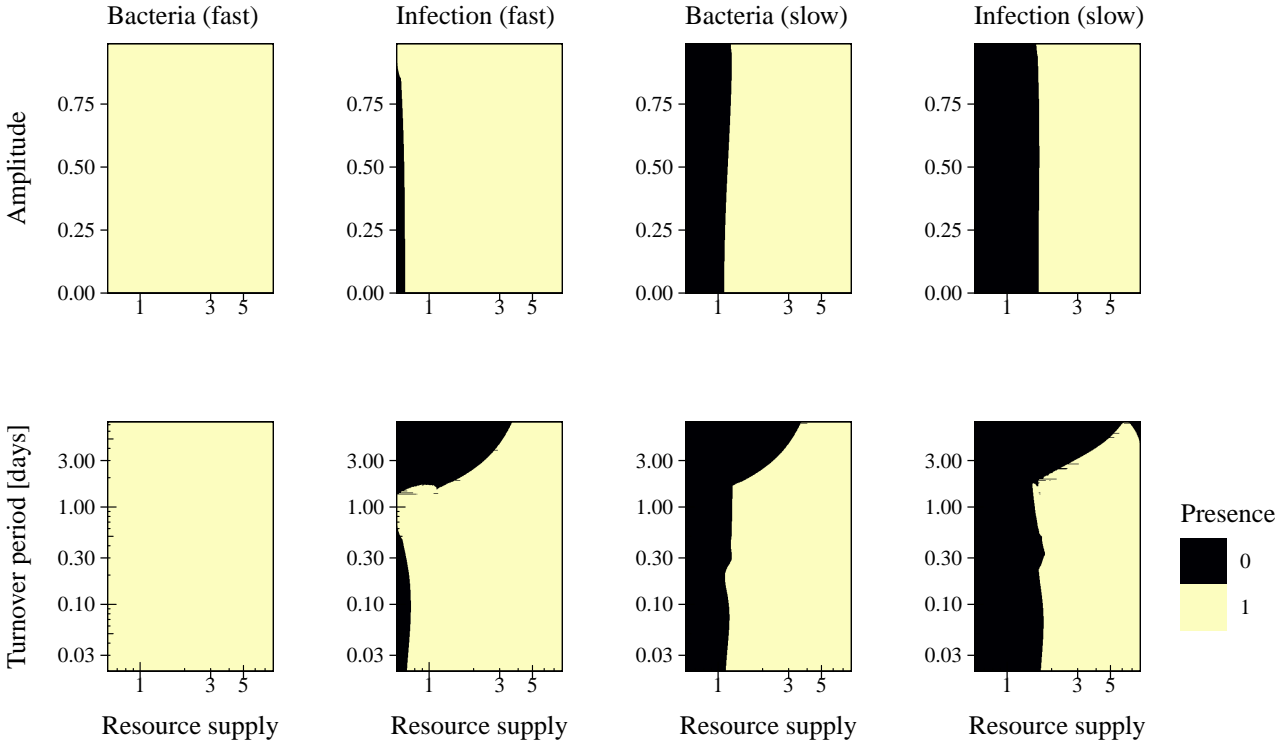

Supplement: Figure_S8.pdf [file Figure_S8.pdf]
